# Supplementary material
Source: ML conference proceedings conference paper supplement (https://openreview.net/forum?id=7YTh6S8HIY)
Supplement: supplementary_material [file attachment]

---

# PyramidCLIP: Hierarchical Feature Alignment for Vision-language Model Pretraining

---

Anonymous Author(s)

Affiliation

Address

email

## 1 A Pre-training Stage Settings

### 2 A.1 Datasets

3 In Section 4.1, we list all the subsets of the total 143M dataset, and here we introduce them in detail.  
4 SBU [1] is a relatively small image-text dataset, which contains 1 million image-text pairs obtained  
5 from Flickr. YFCC15M [2] is a commonly used subset of YFCC100M [2] and there are mainly two  
6 versions of YFCC15M, V1 and V2. YFCC15M-V1 is obtained by applying the same filtering rule on  
7 YFCC100M as CLIP [3], while YFCC15M-V2 is collected by DeCLIP [4] with a different filtering  
8 strategy. In addition to a subset of YFCC, the V2 dataset also contains some additional data crawled  
9 from the Internet and is of higher quality than V1. CC3M [5] and CC12M [6] conduct the same  
10 image-text filter pipeline on Internet webpage sources, and the difference is that the filtering method  
11 of the latter is more relaxed. LAION400M [7] is one of the largest openly available image-text  
12 datasets. We rank the image-text pairs by their similarity scores, which are pre-computed by the  
13 producer using a pre-trained CLIP model, and pick up a 99M subset with the highest similarity scores.  
14 Combining all the above datasets, we finally have a dataset of 143M image-text pairs. During the  
15 training process, we randomly shuffle the training sequence of datasets at the beginning of each  
16 training epoch, then train our model on these datasets one by one.

### 17 A.2 Implementation Details

18 **Model Architectures** We follow the same architecture design as CLIP [3] for PyramidCLIP-  
19 ResNet50/ViT-B32/ViT-B16, except that we incorporate a depth-wise convolution into the Feed-  
20 Forward module of ViT, namely, LeFF. The input resolution of image encoder is  $224 \times 224$  and the  
21 maximum context length of text encoder is 77. The final image and text features are projected to the  
22 same dimension, which is 1024 for PyramidCLIP-ResNet50 and 512 for PyramidCLIP-ViT, followed  
23 by L2 normalization before interaction.

24 **Details of the Object-attribute Detector** The object-attribute detector, adopting the framework of  
25 Faster R-CNN [8], is pre-trained by VinVL [9]. And image is resized to the resolution of  $640 \times 640$   
26 before entering the detector. We take 10 objects with the highest confidence from the detector to  
27 obtain the corresponding ROI features and category descriptions with attribute information.

28 **Pre-training Setup** We train our PyramidCLIP using an AdamW [10] optimizer and the cosine  
29 learning rate scheduler with a linear warmup. Specifically, the learning rate linearly increases from 0  
30 to the peak value within 10% of the total steps, and then decreases with a cosine anneal strategy. The  
31 weight decay rate of AdamW is set to 0.2. To save GPU memory, automatic mixed-precision [11] is  
32 used. The models are trained from scratch for either 8 or 32 epochs in our experiments, *i.e.*, 8 epochs  
33 for ablation and 32 epochs for comparison. When training on 15M datasets, including YFCC15M-V1,  
34 V2 and LAION15M, the batch size is set to 4096 and the peak learning rate is set to  $2 \times 10^{-3}$ . While  
35 on the 143M large-scale dataset, the batch size is set to 8192 and the peak learning rate is set to

36  $5 \times 10^{-4}$ . Besides, PyramidCLIP-ResNet50/ViT-B32 takes 64 V100 GPUs to train on 143M data,  
 37 while PyramidCLIP-ViT-B16 takes 128 A100 GPUs.

## 38 B Downstream Settings

### 39 B.1 Datasets for Downstream Classification Task

40 Besides ImageNet [12], we also evaluate the transferability of our model on other 10 downstream  
 41 classification datasets including Oxford-IIIT Pets [13], CIFAR-10 [14], CIFAR-100 [14], Describable  
 42 Textures [15], Stanford Cars[16], Food-101 [17], Oxford Flowers 102 [18], FGVC Aircraft [19],  
 43 SUN397 [20] and Caltech-101 [21]. The details of each dataset are listed in Table 1 and we follow  
 44 the same data split and evaluation metric as CLIP for fair comparison.

Table 1: Datasets for downstream classification task.

| Dataset              | Abbreviation | Classes | Train Size | Test Size | Evaluation Metric |
|----------------------|--------------|---------|------------|-----------|-------------------|
| CIFAR-10             | C10          | 10      | 50,000     | 10,000    | accuracy          |
| CIFAR-100            | C100         | 100     | 50,000     | 10,000    | accuracy          |
| Describable Textures | DTD          | 47      | 3,760      | 1,880     | accuracy          |
| Stanford Cars        | CARS         | 196     | 8,144      | 8,041     | accuracy          |
| Food-101             | F101         | 101     | 75,750     | 25,250    | accuracy          |
| Oxford-IIIT Pets     | PETS         | 37      | 3,680      | 3,669     | mean per class    |
| Oxford Flowers 102   | FLOW         | 102     | 2,040      | 6,149     | mean per class    |
| FGVC Aircraft        | AIR          | 100     | 6,667      | 3,333     | mean per class    |
| SUN397               | SUN          | 397     | 19,850     | 19,850    | accuracy          |
| Caltech-101          | CAL          | 102     | 3,060      | 6,085     | mean per class    |
| ImageNet             | IN           | 1000    | 1,281,167  | 50,000    | accuracy          |

### 45 B.2 Implementation Details

46 **Downstream Zero-shot Image Classification** Due to the fact that the labels of common classification  
 47 datasets are mostly nouns rather than natural language descriptions, we adopt the same prompt setting  
 48 as used in CLIP, that is, for every single class name, we generate 80 different textual descriptions  
 49 with 80 prompt templates (such as “a photo of label”). The ensembles of these textual representations  
 50 are used in computing similarities between images and label names.

51 **Downstream Zero-shot Image-text Retrieval** The image-text retrieval task can be split into two  
 52 sub-tasks, *i.e.*, image retrieval and text retrieval, according to the target modality. We evaluate the  
 53 zero-shot image-text retrieval capabilities on Flickr30K and MS-COCO dataset, which is performed  
 54 by ranking image-text pairs according to their similarity scores.

55 **Downstream Image Linear Probe** To implement linear probe evaluation, we follow CLIP [3] to  
 56 train a logistic regression classifier on the frozen visual features extracted by the image encoder.  
 57 Specifically, we train the logistic regression classifier using L-BFGS algorithm provided by scikit-  
 58 learn with maximum 1,000 iterations, and report the corresponding metric for each dataset. Moreover,  
 59 the L2 regularization strength  $C$  is determined using hyperparameter sweep on the validation sets.

60 **Downstream Object Detection and Instance Segmentation** Following [22, 23], for the downstream  
 61 object detection and instance segmentation tasks, all the parameters are fine-tuned. For detection task  
 62 on PASCAL VOC, the detector is trained for 24k steps with a batch size of 40, and the initial learning  
 63 rate is 0.02 with 100 warm-up iterations and decays by 10 at 18k, 22k steps. The scale of image is  
 64 randomly sampled from [480, 800] with interval 32 during training and is set to 800 for inference.  
 65 For the detection and instance segmentation on COCO, the model is trained for 90k iterations with  
 66 the initial learning rate 0.02, and the scales of images are randomly sampled from [600, 800] during  
 67 training and is also set to 800 for inference.

68 **Downstream Image End-to-end Fine-tuning** In addition to the five downstream tasks mentioned  
 69 in the main text, following MAE [24], we also conduct the end-to-end fine-tuning experiments on  
 70 downstream classification task. Here, we elaborate the implementation details of this setting, and the  
 71 corresponding results can be seen in Appendix E. For downstream end-to-end fine-tuning, we first

72 fine-tune the classifier layer alone while freezing the others for 8 epochs to endow the model a proper  
 73 initialization. Then we fine-tune all the parameters in the usual manner. AdamW is used as optimizer,  
 74 and the learning rate is set to 1e-3 and adjusted by a cosine learning rate scheduler without warmup.  
 75 We totally fine-tune the model for 128 epochs, including the initialization stage.

## 76 C Fair Comparison on YFCC15M-V1 and LAION15M

77 In this section, we compare our PyramidCLIP against CLIP under the same amount of pre-training  
 78 data, *i.e.*, YFCC15M-V1 and LAION15M. The results on downstream zero-shot image-text retrieval  
 79 task and ImageNet classification are shown in Table 2 and Table 3. It can be seen that PyramidCLIP  
 80 surpasses CLIP regardless of the distribution of pre-training dataset, demonstrating the superiority  
 81 of our pre-training method. Furthermore, we validate the effectiveness of proposed method on  
 82 downstream object detection and instance segmentation tasks, and the results are shown in Table 4. It  
 83 can be seen that the weights of our model exceeds that of CLIP model on both object detection task  
 84 and instance segmentation task. Noting, on object detection task, the improvement on PASCAL VOC  
 85 is more obvious than that on MS-COCO, since the amount of PASCAL VOC is smaller than COCO  
 86 and the effect of weight initialization is more conspicuous.

**Table 2:** Zero-shot image-text retrieval results on MS-COCO and zero-shot top1 accuracy on ImageNet. All the models are pre-trained on YFCC15M-V1 for 32 epochs, except SLIP [25] for 100 epochs.

| Method                 | Image Encoder | MS-COCO     |             |             |             | ImageNet    |
|------------------------|---------------|-------------|-------------|-------------|-------------|-------------|
|                        |               | I2T R@1     | I2T R@5     | T2I R@1     | T2I R@5     | ZS Top1     |
| CLIP <sup>◊</sup>      | ResNet50      | 29.8        | 56.9        | 19.3        | 40.9        | 36.8        |
| <b>PyramidCLIP</b>     | ResNet50      | <b>39.9</b> | <b>66.2</b> | <b>24.9</b> | <b>49.3</b> | <b>43.7</b> |
| CLIP <sup>◊</sup>      | ViT-B/32      | 24.2        | 48.3        | 14.0        | 33.1        | 31.2        |
| <b>PyramidCLIP</b>     | ViT-B/32      | <b>34.2</b> | <b>60.2</b> | <b>21.1</b> | <b>44.0</b> | <b>41.7</b> |
| CLIP <sup>◊</sup>      | ViT-B/16      | 30.3        | 56.1        | 18.9        | 40.0        | 36.9        |
| SLIP <sup>†</sup> [25] | ViT-B/16      | 33.9        | 60.0        | 22.5        | 45.4        | 45.0        |
| <b>PyramidCLIP</b>     | ViT-B/16      | <b>38.2</b> | <b>65.0</b> | <b>25.0</b> | <b>49.3</b> | <b>46.0</b> |

◊ Our Implementation

† Tested with released model: <https://github.com/facebookresearch/SLIP#vit-base>

**Table 3:** Zero-shot image-text retrieval results on MS-COCO and zero-shot top1 accuracy on ImageNet. All the models are pre-trained on LAION15M for 32 epochs.

| Method             | Image Encoder | MS-COCO     |             |             |             | ImageNet    |
|--------------------|---------------|-------------|-------------|-------------|-------------|-------------|
|                    |               | I2T R@1     | I2T R@5     | T2I R@1     | T2I R@5     | ZS Top1     |
| CLIP <sup>◊</sup>  | ResNet50      | 31.5        | 57.0        | 18.9        | 39.8        | 35.6        |
| <b>PyramidCLIP</b> | ResNet50      | <b>33.3</b> | <b>60.4</b> | <b>24.4</b> | <b>48.4</b> | <b>41.9</b> |
| CLIP <sup>◊</sup>  | ViT-B/32      | 25.9        | 49.8        | 15.6        | 34.8        | 32.6        |
| <b>PyramidCLIP</b> | ViT-B/32      | <b>28.5</b> | <b>55.5</b> | <b>21.2</b> | <b>43.7</b> | <b>39.9</b> |
| CLIP <sup>◊</sup>  | ViT-B/16      | 31.4        | 56.2        | 19.2        | 40.6        | 38.3        |
| <b>PyramidCLIP</b> | ViT-B/16      | <b>32.2</b> | <b>60.7</b> | <b>25.6</b> | <b>49.8</b> | <b>45.3</b> |

◊ Our Implementation

## 87 D Downstream Task: Linear Probe

88 We first validate the transferability of our method on downstream classification task via linear probe.  
 89 The results are exhibited in Table 5. It can be seen that when the image encoder is ViT-B/32, the  
 90 average accuracy of PyramidCLIP pre-trained on 143M data exceeds that of CLIP using 400M data.  
 91 Furthermore, regardless of the image encoder used, our method outperforms CLIP on more than half  
 92 of the small datasets, noting that the amount of pre-training data we used is only about 36% of that  
 93 used by CLIP, further demonstrating the effectiveness of the proposed method.

**Table 4:** Fair comparison on object detection and instance segmentation tasks with ResNet50 as backbone.

| Initialized Weights | Pre-train Dataset | Object Detection |                |                |             |                |                | Instance Segmentation |                |                |
|---------------------|-------------------|------------------|----------------|----------------|-------------|----------------|----------------|-----------------------|----------------|----------------|
|                     |                   | VOC              |                |                | COCO        |                |                | COCO                  |                |                |
|                     |                   | $AP^{bb}$        | $AP_{50}^{bb}$ | $AP_{75}^{bb}$ | $AP^{bb}$   | $AP_{50}^{bb}$ | $AP_{75}^{bb}$ | $AP^{mk}$             | $AP_{50}^{mk}$ | $AP_{75}^{mk}$ |
| CLIP <sup>◊</sup>   | YFCC15M-V1        | 46.0             | 74.0           | 48.2           | 35.4        | 54.8           | 37.9           | 30.9                  | 51.5           | 32.7           |
| <b>PyramidCLIP</b>  | YFCC15M-V1        | <b>49.8</b>      | <b>77.7</b>    | <b>53.5</b>    | <b>37.1</b> | <b>57.1</b>    | <b>39.9</b>    | <b>32.3</b>           | <b>53.4</b>    | <b>34.1</b>    |
| CLIP <sup>◊</sup>   | LAION15M          | 46.8             | 74.9           | 49.5           | 35.5        | 54.9           | 37.9           | 30.9                  | 51.4           | 32.4           |
| <b>PyramidCLIP</b>  | LAION15M          | <b>49.7</b>      | <b>77.7</b>    | <b>53.3</b>    | <b>36.5</b> | <b>56.1</b>    | <b>38.9</b>    | <b>31.9</b>           | <b>52.7</b>    | <b>33.5</b>    |

◊ Our Implementation

**Table 5:** Linear probe accuracy on 10 datasets. C10/100/F101/FLOW/CAL/AIR is CIFAR-10/CIFAR-100/Food101/Flowers/Caltech/Aircraft. AVG represents average accuracy across 10 datasets.

| Method             | Image Encoder | Pretrain Dataset | PETS        | C10         | C100        | DTD         | CARS        | F101        | FLOW        | AIR         | SUN         | CAL         | AVG         |
|--------------------|---------------|------------------|-------------|-------------|-------------|-------------|-------------|-------------|-------------|-------------|-------------|-------------|-------------|
| CLIP*              | ViT-B/32      | 400M             | 85.3        | 95.1        | 80.5        | 76.5        | 81.8        | <b>88.8</b> | <b>96.9</b> | <b>52.0</b> | 76.6        | 93.0        | 82.7        |
| <b>PyramidCLIP</b> | ViT-B/32      | 143M             | <b>87.8</b> | <b>96.0</b> | <b>82.5</b> | <b>77.3</b> | <b>82.6</b> | 83.3        | 93.9        | 50.2        | <b>77.5</b> | <b>96.4</b> | <b>82.8</b> |
| CLIP*              | ViT-B/16      | 400M             | <b>93.1</b> | 96.2        | 83.1        | 79.2        | 86.7        | <b>92.8</b> | <b>98.1</b> | <b>59.5</b> | 78.4        | 94.7        | <b>86.2</b> |
| <b>PyramidCLIP</b> | ViT-B/16      | 143M             | 90.3        | <b>96.5</b> | <b>83.5</b> | <b>79.3</b> | <b>86.9</b> | 88.1        | 95.6        | 56.5        | <b>79.9</b> | <b>96.5</b> | 85.3        |

\* Tested with the released model: <https://github.com/openai/CLIP#api>

## 94 E Downstream Task: End-to-end Fine-tuning

95 On the basis of linear probe, we further validate the transferability of our method via end-to-end  
 96 fine-tuning. The results are shown in Table 6. We compare PyramidCLIP against CLIP and supervised  
 97 counterpart. It can be seen that PyramidCLIP pre-trained on 143M data exceeds both CLIP and  
 98 supervised ResNet50. Also, it is worth noting that compared to CLIP, we use only 36% pre-training  
 99 data, and compared with ResNet50 trained on manually-labeled ImageNet-1K, we didn't use any  
 100 manually-labeled data.

**Table 6:** End-to-end fine-tuning accuracy on 11 downstream classification datasets with ResNet50 backbone. C10/C100/F101/FLOW/CAL/AIR/IN is CIFAR-10/CIFAR-100/Food101/Flowers/Caltech/Aircraft/ImageNet1k. AVG represents average accuracy across 11 datasets. Supervised(IN1K) denotes the model is supervised trained on ImageNet-1K dataset.

| Method                        | Pretrain Dataset | PETS        | C10         | C100        | DTD         | CARS        | F101        | FLOW        | AIR         | SUN         | CAL         | IN          | AVG         |
|-------------------------------|------------------|-------------|-------------|-------------|-------------|-------------|-------------|-------------|-------------|-------------|-------------|-------------|-------------|
| Supervised(IN1K) <sup>†</sup> | 1.2M             | <b>93.0</b> | 94.0        | <b>77.8</b> | 68.4        | 65.6        | 81.3        | <b>89.7</b> | <b>60.0</b> | 62.3        | 90.8        | 76.2        | 78.1        |
| CLIP*                         | 400M             | 74.5        | 95.0        | 69.4        | 70.4        | 73.4        | 86.4        | 88.4        | 57.8        | 65.4        | 89.7        | 76.6        | 77.0        |
| <b>PyramidCLIP</b>            | 143M             | 75.4        | <b>95.2</b> | 74.8        | <b>72.0</b> | <b>77.7</b> | <b>86.7</b> | 87.7        | 58.4        | <b>68.6</b> | <b>92.0</b> | <b>78.0</b> | <b>78.8</b> |

\* Initialized with the released model: <https://github.com/openai/CLIP#api>

<sup>†</sup> Initialized with model from torchvision: <https://download.pytorch.org/models/resnet50-0676ba61.pth>

## 101 F More Ablation

102 In this section, we supplement the ablation study of some important components in PyramidCLIP.  
 103 All the ablation experiments are conducted on YFCC15M-V1 and trained for 8 epochs.

### 104 F.1 Supplementary Ablation of PyramidCLIP Components

105 **Ablation of Each Component on Other Downstream Tasks** In Section 4.6, we only provide ablation  
 106 study of each component on ImageNet zero-shot classification. Here we list the corresponding ablation  
 107 results on MS-COCO zero-shot image-text retrieval and PASCAL VOC object detection in Table 7,  
 108 which indicate that on the basis of the peer-level alignment, all the other components in PyramidCLIP  
 109 can still bring accuracy improvement individually on the two downstream tasks.

**Table 7:** Ablation study of each component on MS-COCO zero-shot image-text retrieval and PASCAL VOC object detection. ‘‘Soften’’ means all the objectives are softened.

| Image Encoder | Components                  |                                              |                                             |        |      | MS-COCO           |                   | PASCAL VOC        |                   |
|---------------|-----------------------------|----------------------------------------------|---------------------------------------------|--------|------|-------------------|-------------------|-------------------|-------------------|
|               | $\mathcal{L}_{\text{peer}}$ | $\mathcal{L}_{\text{cross}}^{\text{global}}$ | $\mathcal{L}_{\text{cross}}^{\text{local}}$ | Soften | LeFF | I2T R@1           | T2I R@1           | $AP^{bb}$         | $AP_{50}^{bb}$    |
| ResNet50      | ✓                           |                                              |                                             |        | -    | 28.5              | 16.6              | 45.7              | 74.3              |
|               | ✓                           | ✓                                            |                                             |        | -    | 31.9(+3.4)        | 18.5(+1.9)        | 46.5(+0.8)        | 75.1(+0.8)        |
|               | ✓                           | ✓                                            | ✓                                           |        | -    | 34.6(+6.1)        | 19.6(+3.0)        | 47.0(+1.3)        | 75.6(+1.3)        |
|               | ✓                           | ✓                                            | ✓                                           | ✓      | -    | <b>36.4(+7.9)</b> | <b>21.1(+4.5)</b> | <b>47.4(+1.7)</b> | <b>76.0(+1.7)</b> |
| ViT-B/32      | ✓                           |                                              |                                             |        |      | 24.3              | 13.4              | -                 | -                 |
|               | ✓                           | ✓                                            |                                             |        |      | 27.9(+3.6)        | 16.0(+2.6)        | -                 | -                 |
|               | ✓                           | ✓                                            | ✓                                           |        |      | 29.3(+5.0)        | 17.7(+4.3)        | -                 | -                 |
|               | ✓                           | ✓                                            | ✓                                           | ✓      |      | 31.4(+7.1)        | 18.2(+4.8)        | -                 | -                 |
|               | ✓                           | ✓                                            | ✓                                           | ✓      | ✓    | <b>31.7(+7.4)</b> | <b>18.8(+5.4)</b> | -                 | -                 |

110 **The Influence of Different  $L_s$  Settings** We further probe  
 111 into the influence of the transformer layers  $L_s$  in the front  
 112 part of ViT-based image encoder on zero-shot ImageNet  
 113 classification task. Note that the total number of trans-  
 114 former layers  $L$  in ViT is 12. The corresponding results  
 115 with different  $L_s$  values are shown in Figure 1. It can be  
 116 found that  $L_s = 9$  achieves the best result, hence  $L_s$  is set  
 117 to 9 in our experiments. Besides,  $L_s = 0$  represents that  
 118 the feature sequence  $\mathcal{F}$  is feed into the first transformer  
 119 layer of ViT and all the 12 layers are without LeFF. While  
 120  $L_s = 12$  indicates that all the 12 layers are with LeFF  
 121 and the raw sequence  $\mathcal{F}$  is directly input to the final project-  
 122 or without being processed by transformer, which is the  
 123 reason why  $L_s = 12$  shows such poor performance.

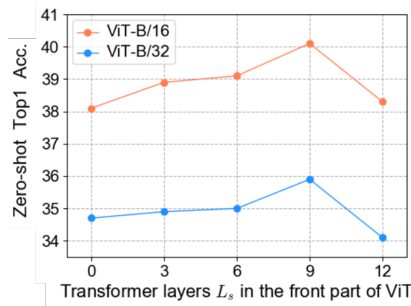

**Figure 1:** Zero-shot performance with different settings of  $L_s$ .

## 124 F.2 Ablation of Other Possible Alignments

125 In addition to the current six loss terms of PyramidCLIP described in the main text, *i.e.*, the peer-level  
 126 semantics alignment  $\mathcal{L}_{GS}$  and  $\mathcal{L}_{LT}$ , the global-relation cross-level alignment  $\mathcal{L}_{GA}$  and  $\mathcal{L}_{RS}$ , and the  
 127 local-relation cross-level alignment  $\mathcal{L}_{LA}$  and  $\mathcal{L}_{RT}$ , there are three other possible losses that are  $\mathcal{L}_{RA}$ ,  
 128  $\mathcal{L}_{GT}$  and  $\mathcal{L}_{LS}$ , corresponding to  $(v^r, l^a)$ ,  $(v^g, l^t)$  and  $(v^l, l^s)$  respectively, as depicted in Figure 2(a).  
 129 Note that  $\mathcal{L}_{RA}$  belongs to the peer-level alignment, and  $\mathcal{L}_{GT}$  and  $\mathcal{L}_{LS}$  are semantically mismatched.  
 130 Among them,  $\mathcal{L}_{GT}$  is actually the original CLIP loss, shown in Figure 2(b). We will discuss the  
 131 influence of these three losses in next two parts and explain why they are not incorporated into our  
 132 PyramidCLIP paradigm.

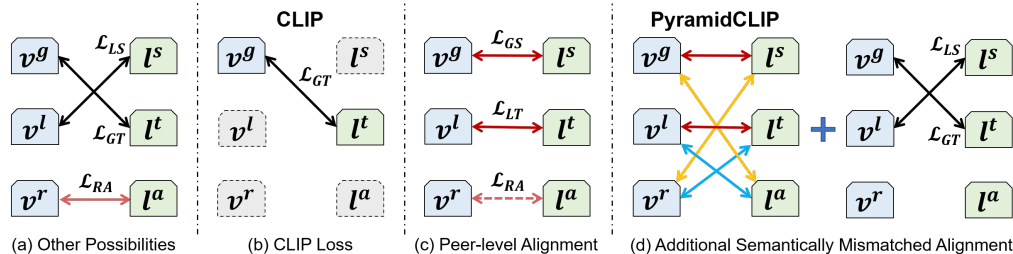

**Figure 2:** Schematic diagram of various losses. (a) Other three possible losses besides PyramidCLIP. (b) The original CLIP loss. (c) Peer-level alignment.  $\mathcal{L}_{RA}$  also belongs to it but is not included in PyramidCLIP. (d) Adding semantically mismatched alignment  $\mathcal{L}_{GT}$  and  $\mathcal{L}_{LS}$  into PyramidCLIP.

133 **Granular Ablation of Peer-level Alignment** In this part, we explore the influence of each sub-  
 134 component belonging to the peer-level alignment, including  $\mathcal{L}_{GS}$ ,  $\mathcal{L}_{LT}$  and  $\mathcal{L}_{RA}$ , shown in Figure 2(c),  
 135 and compared with original CLIP loss. As listed in Table 8, reducing the image random crop ratio of

136 CLIP can improve the model performance, *i.e.*, using  $\mathcal{L}_{LT}$  rather than  $\mathcal{L}_{GT}$  (see yellow rows), since  
 137 the local view statistically removes some redundant information in the image, *i.e.*, some sub-regions  
 138 not described in the text. That is why we use the image local view and the original text as a pair to  
 139 construct the peer-level local contrast. Besides, it can be seen that the addition of global contrast  $\mathcal{L}_{GS}$   
 140 also brings significant improvement. However, there is no further gain when bringing into  $\mathcal{L}_{RA}$  (see  
 141 blue rows), hence it is not included in PyramidCLIP. And we attribute this to the inherent precise  
 142 alignment between the ROI feature sequence  $\mathcal{R}$  and the object-attribute description  $T_{OA}$ , since the  
 143 feature and category with attributes of each salient object in the image are extracted in pairs by the  
 144 pre-trained powerful object-attribute detector.

**Table 8:** Granular ablation results of peer-level alignment compared to the original CLIP loss.

| Image Encoder | Method                                                   | ImageNet   | MS-COCO    |            | PASCAL VOC |                |
|---------------|----------------------------------------------------------|------------|------------|------------|------------|----------------|
|               |                                                          | ZS Top1    | I2T R@1    | T2I R@1    | $AP^{bb}$  | $AP_{50}^{bb}$ |
| ResNet50      | $\mathcal{L}_{GT}$ (CLIP)                                | 30.0       | 26.0       | 13.5       | 44.6       | 73.4           |
|               | $\mathcal{L}_{LT}$                                       | 30.8(+0.8) | 26.5(+0.5) | 14.0(+0.5) | 44.9(+0.3) | 73.5(+0.1)     |
|               | $\mathcal{L}_{LT} + \mathcal{L}_{GS}$                    | 32.8(+2.8) | 28.5(+2.5) | 16.6(+3.1) | 45.7(+1.1) | 74.3(+0.9)     |
|               | $\mathcal{L}_{LT} + \mathcal{L}_{GS} + \mathcal{L}_{RA}$ | 32.7       | 28.5       | 16.7       | 45.7       | 74.4           |
| ViT-B/32      | $\mathcal{L}_{GT}$ (CLIP)                                | 24.1       | 19.4       | 9.8        | -          | -              |
|               | $\mathcal{L}_{LT}$                                       | 25.7(+1.6) | 21.6(+2.2) | 11.3(+1.5) | -          | -              |
|               | $\mathcal{L}_{LT} + \mathcal{L}_{GS}$                    | 28.8(+4.7) | 24.3(+4.9) | 13.4(+3.6) | -          | -              |
|               | $\mathcal{L}_{LT} + \mathcal{L}_{GS} + \mathcal{L}_{RA}$ | 29.0       | 24.1       | 13.5       | -          | -              |

145 **Ablation of Semantically Mismatched Alignment** On the basis of PyramidCLIP paradigm, we  
 146 further study on the additional effect of  $\mathcal{L}_{GT}$  and  $\mathcal{L}_{LS}$ , termed as semantically mismatched alignment,  
 147 shown in Figure 2(d). The ablation results are listed in Table 9, which reveal that adding semantically  
 148 mismatched alignment cannot bring stable benefits, even degrades the performance in most cases.  
 149 Therefore  $\mathcal{L}_{GT}$  and  $\mathcal{L}_{LS}$  are not attached to the PyramidCLIP paradigm, which is consistent with our  
 150 motivation, *i.e.* addressing the semantics mismatch problem.

**Table 9:** Ablation results of semantics mismatched alignment on the basis of current PyramidCLIP paradigm.

| Image Encoder | Method                                   | ImageNet    | MS-COCO     |             | PASCAL VOC  |                |
|---------------|------------------------------------------|-------------|-------------|-------------|-------------|----------------|
|               |                                          | ZS Top1     | I2T R@1     | T2I R@1     | $AP^{bb}$   | $AP_{50}^{bb}$ |
| ResNet50      | Baseline (PyramidCLIP)                   | <b>38.6</b> | <b>36.4</b> | <b>21.1</b> | <b>47.4</b> | <b>76.0</b>    |
|               | w/ $\mathcal{L}_{GT}$                    | 38.3        | 36.1        | 20.9        | 47.1        | 75.2           |
|               | w/ $\mathcal{L}_{LS}$                    | 38.4        | 35.7        | 20.8        | 46.9        | 75.7           |
|               | w/ $\mathcal{L}_{GT} + \mathcal{L}_{LS}$ | 38.4        | 36.3        | <b>21.1</b> | 46.5        | 75.1           |
| ViT-B/32      | Baseline (PyramidCLIP)                   | <b>35.9</b> | 31.7        | <b>18.8</b> | -           | -              |
|               | w/ $\mathcal{L}_{GT}$                    | 35.6        | <b>32.2</b> | 18.7        | -           | -              |
|               | w/ $\mathcal{L}_{LS}$                    | 35.5        | 29.6        | 17.8        | -           | -              |
|               | w/ $\mathcal{L}_{GT} + \mathcal{L}_{LS}$ | 35.5        | 30.9        | 18.1        | -           | -              |

## 151 G More Visualizations

152 In this section, more Grad-CAM heatmaps are visualized through text-to-image retrieval on MS-  
 153 COCO. We utilize codes provided in [26] to implement Grad-CAM visualization. As shown in  
 154 Figure 3, CLIP is more likely to focus on the scene or background areas in the images corresponding  
 155 to the scene descriptions in query texts, while PyramidCLIP pay more attention to salient objects,  
 156 which benefits from the introduce of cross-level relation alignment. For example, in Figure 3(b),  
 157 CLIP focuses on areas corresponding to "green field" in the query text, while PyramidCLIP on  
 158 "horse". In Figure 3(d), CLIP focuses on areas corresponding to "mountain", while PyramidCLIP  
 159 on "skier with a red jacket". And the same phenomenon can also be seen in Figure 3(a)(c).

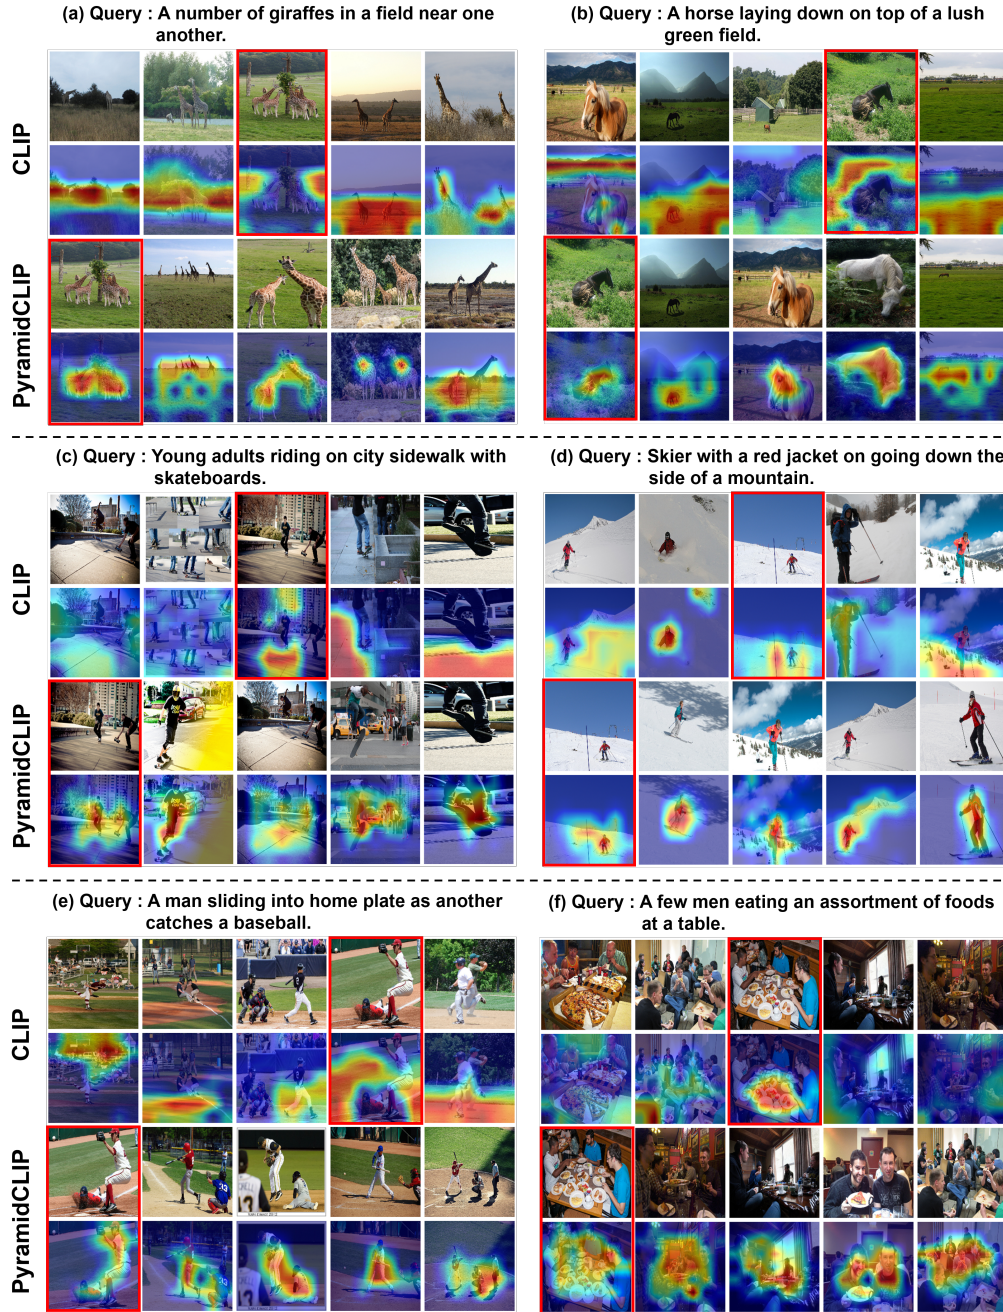

**Figure 3:** More Grad-CAM visualizations through text-to-image retrieval on MS-COCO. From left to right are images from rank1 to rank5. Red box indicates the groundtruth image matched with the query text.

160 **References**

161 [1] V. Ordonez, G. Kulkarni, and T. Berg, “Im2text: Describing images using 1 million captioned photographs,”  
 162 *Proc. Advances in Neural Information Processing Systems*, vol. 24, 2011.

163 [2] B. Thomee, D. A. Shamma, G. Friedland, B. Elizalde, K. Ni, D. Poland, D. Borth, and L.-J. Li, “Yfcc100m:  
 164 The new data in multimedia research,” *Communications of the ACM*, vol. 59, no. 2, pp. 64–73, 2016.

165 [3] A. Radford, J. W. Kim, C. Hallacy, A. Ramesh, G. Goh, S. Agarwal, G. Sastry, A. Askell, P. Mishkin,  
 166 J. Clark *et al.*, “Learning transferable visual models from natural language supervision,” in *Proc. Interna-*  
 167 *tional Conf. Machine Learning*, 2021, pp. 8748–8763.

- 168 [4] Y. Li, F. Liang, L. Zhao, Y. Cui, W. Ouyang, J. Shao, F. Yu, and J. Yan, "Supervision exists everywhere: A  
169 data efficient contrastive language-image pre-training paradigm," *arXiv preprint arXiv:2110.05208*, 2021.
- 170 [5] P. Sharma, N. Ding, S. Goodman, and R. Soricut, "Conceptual captions: A cleaned, hypernymed, image alt-  
171 text dataset for automatic image captioning," in *Proceedings of the 56th Annual Meeting of the Association  
172 for Computational Linguistics (Volume 1: Long Papers)*, 2018, pp. 2556–2565.
- 173 [6] S. Changpinyo, P. Sharma, N. Ding, and R. Soricut, "Conceptual 12m: Pushing web-scale image-text  
174 pre-training to recognize long-tail visual concepts," in *Proceedings of the IEEE/CVF Conference on  
175 Computer Vision and Pattern Recognition*, 2021, pp. 3558–3568.
- 176 [7] C. Schuhmann, R. Vencu, R. Beaumont, R. Kaczmarczyk, C. Mullis, A. Katta, T. Coombes, J. Jitsev, and  
177 A. Komatsuzaki, "Laion-400m: Open dataset of clip-filtered 400 million image-text pairs," *arXiv preprint  
178 arXiv:2111.02114*, 2021.
- 179 [8] S. Ren, K. He, R. Girshick, and J. Sun, "Faster R-CNN: Towards real-time object detection with region  
180 proposal networks," *Proc. Advances in Neural Information Processing Systems*, vol. 28, 2015.
- 181 [9] P. Zhang, X. Li, X. Hu, J. Yang, L. Zhang, L. Wang, Y. Choi, and J. Gao, "Vinvl: Revisiting visual repre-  
182 sentations in vision-language models," in *Proc. IEEE/CVF Conf. Computer Vision & Pattern Recognition*,  
183 2021, pp. 5579–5588.
- 184 [10] I. Loshchilov and F. Hutter, "Decoupled weight decay regularization," *arXiv preprint arXiv:1711.05101*,  
185 2017.
- 186 [11] P. Micikevicius, S. Narang, J. Alben, G. Diamos, E. Elsen, D. Garcia, B. Ginsburg, M. Houston,  
187 O. Kuchaiev, G. Venkatesh, and H. Wu, "Mixed precision training," in *International Conference on  
188 Learning Representations*, 2018.
- 189 [12] J. Deng, W. Dong, R. Socher, L.-J. Li, K. Li, and L. Fei-Fei, "Imagenet: A large-scale hierarchical image  
190 database," in *Proc. IEEE Conf. Computer Vision and Pattern Recognition*, 2009, pp. 248–255.
- 191 [13] O. M. Parkhi, A. Vedaldi, A. Zisserman, and C. Jawahar, "Cats and dogs," in *Proceedings of the IEEE  
192 international conference on computer vision*. IEEE, 2012, pp. 3498–3505.
- 193 [14] A. Krizhevsky, G. Hinton *et al.*, "Learning multiple layers of features from tiny images," Tech. Rep., 2009.
- 194 [15] M. Cimpoi, S. Maji, I. Kokkinos, S. Mohamed, , and A. Vedaldi, "Describing textures in the wild," in  
195 *Proceedings of the IEEE international conference on computer vision*, 2014.
- 196 [16] J. Krause, M. Stark, J. Deng, and L. Fei-Fei, "3d object representations for fine-grained categorization," in  
197 *Proceedings of the IEEE international conference on computer vision workshops*, 2013, pp. 554–561.
- 198 [17] L. Bossard, M. Guillaumin, and L. Van Gool, "Food-101 – mining discriminative components with random  
199 forests," in *Proc. European Conf. Computer Vision*, 2014.
- 200 [18] M.-E. Nilsback and A. Zisserman, "Automated flower classification over a large number of classes," in  
201 *2008 Sixth Indian Conference on Computer Vision, Graphics & Image Processing*. IEEE, 2008, pp.  
202 722–729.
- 203 [19] S. Maji, E. Rahtu, J. Kannala, M. Blaschko, and A. Vedaldi, "Fine-grained visual classification of aircraft,"  
204 *arXiv preprint arXiv:1306.5151*, 2013.
- 205 [20] J. Xiao, J. Hays, K. A. Ehinger, A. Oliva, and A. Torralba, "Sun database: Large-scale scene recognition  
206 from abbey to zoo," in *IEEE computer society conference on computer vision and pattern recognition*.  
207 IEEE, 2010, pp. 3485–3492.
- 208 [21] L. Fei-Fei, R. Fergus, and P. Perona, "Learning generative visual models from few training examples: An  
209 incremental bayesian approach tested on 101 object categories," in *Proceedings of the IEEE international  
210 conference on computer vision workshop*. IEEE, 2004, pp. 178–178.
- 211 [22] Z. Fang, J. Wang, L. Wang, L. Zhang, Y. Yang, and Z. Liu, "Seed: Self-supervised distillation for visual  
212 representation," *arXiv preprint arXiv:2101.04731*, 2021.
- 213 [23] Y. Gao, J.-X. Zhuang, K. Li, H. Cheng, X. Guo, F. Huang, R. Ji, and X. Sun, "Disco: Remedy  
214 self-supervised learning on lightweight models with distilled contrastive learning," *arXiv preprint  
215 arXiv:2104.09124*, 2021.
- 216 [24] K. He, X. Chen, S. Xie, Y. Li, P. Dollár, and R. Girshick, "Masked autoencoders are scalable vision  
217 learners," *arXiv preprint arXiv:2111.06377*, 2021.
- 218 [25] N. Mu, A. Kirillov, D. Wagner, and S. Xie, "Slip: Self-supervision meets language-image pre-training,"  
219 *arXiv preprint arXiv:2112.12750*, 2021.
- 220 [26] J. Gildenblat and contributors, "Pytorch library for cam methods," [https://github.com/jacobgil/  
221 pytorch-grad-cam](https://github.com/jacobgil/pytorch-grad-cam), 2021.
